# Supplementary material for: Epidemiological and Clinical Features of SARS-CoV-2 Variants Circulating between April–December 2021 in Italy
Source: MDPI journal article supplement (doi:10.3390/v14112508), 2022-11-12
Supplement: s1 [file s1]

**Supplementary Table S2.** Number of subjects stratified according to clinical and vaccination status and age overtime.

|               |              |      | Month |       |     |      |      |        |           |         |          |          |       |
|---------------|--------------|------|-------|-------|-----|------|------|--------|-----------|---------|----------|----------|-------|
|               |              |      | Age   | April | May | June | July | August | September | October | November | December | Total |
| Asymptomatics | Vaccinated   | <60y | 1     | 2     | /   | 1    | 1    | 4      | 1         | 3       | 18       | 31       |       |
|               |              | ≥60y | 3     | 3     | 1   | 2    | /    | 2      | /         | 2       | 12       | 25       |       |
|               | Unvaccinated | <60y | 9     | 5     | 4   | 3    | 5    | 3      | /         | 1       | 15       | 45       |       |
|               |              | ≥60y | 3     | /     | /   | /    | 2    | /      | /         | /       | 1        | 6        |       |
| Deceased      | Vaccinated   | <60y | /     | /     | /   | /    | /    | 1      | /         | /       | /        | 1        |       |
|               |              | ≥60y | 2     | /     | /   | /    | /    | 2      | 1         | 2       | 1        | 8        |       |
|               | Unvaccinated | <60y | /     | /     | /   | /    | /    | 1      | /         | 1       | /        | 2        |       |
|               |              | ≥60y | 2     | 2     | 2   | 1    | /    | 1      | /         | /       | 1        | 9        |       |
| Hospitalized  | Vaccinated   | <60y | 1     | /     | 2   | 4    | 5    | 2      | 1         | 4       | 4        | 23       |       |
|               |              | ≥60y | 3     | 8     | 3   | 8    | 8    | 6      | 16        | 7       | 16       | 75       |       |
|               | Unvaccinated | <60y | 6     | 16    | 15  | 22   | 10   | 3      | 4         | 5       | 5        | 86       |       |
|               |              | ≥60y | 18    | 13    | 5   | 10   | 7    | 3      | 5         | 3       | 7        | 71       |       |
| Symptomatics  | Vaccinated   | <60y | 3     | /     | 6   | 13   | 16   | 18     | 11        | 36      | 35       | 138      |       |
|               |              | ≥60y | 3     | 2     | /   | 1    | 1    | 16     | 4         | 34      | 24       | 85       |       |
|               | Unvaccinated | <60y | 25    | 26    | 3   | 15   | 44   | 27     | 1         | 5       | 29       | 175      |       |
|               |              | ≥60y | 14    | 10    | 2   | 2    | 3    | /      | 1         | 5       | 4        | 41       |       |
| Total         |              |      | 93    | 87    | 43  | 82   | 102  | 89     | 45        | 108     | 172      |          |       |
