# Supplementary material for: Epidemiological and Clinical Features of SARS-CoV-2 Variants Circulating between April–December 2021 in Italy
Source: MDPI journal article supplement (doi:10.3390/v14112508), 2022-11-12
Supplement: s1 [file s1]

## Supplementary Information

SCIRE collaborative group: Claudia Balotta<sup>1</sup>, Chiara Resnati<sup>1</sup>, Mario Corbellino<sup>1</sup>, Alessandro Occhionero<sup>2</sup>, Katia Marinelli<sup>2</sup>, Valentina Ricucci<sup>3</sup>, Alexander Domnich<sup>3</sup>, Andrea Orsi<sup>3</sup>, Federica Stefanelli<sup>3</sup>, Nadia Randazzo<sup>3</sup>, Giada Garzillo<sup>3</sup>, Lorenzo Piermatteo<sup>5</sup>, Leonardo Duca<sup>5</sup>, Stefano D'Anna<sup>5</sup>, Greta Marchegiani<sup>5</sup>, Nicasio Mancini<sup>7</sup>, Sofia Sisti<sup>7</sup>, Maurizio Zazzi<sup>9</sup>, Lia Fiaschi<sup>9</sup>, Lucrezia Calandrino<sup>10</sup>, Massimo Andreoni<sup>13</sup>, Laura Campogiani<sup>13</sup>, Mirko Compagno<sup>13</sup>, Luigi Coppola<sup>13</sup>, Angela Maria Antonia Crea<sup>13</sup>, Giuseppe De Simone<sup>13</sup>, Andrea Di Lorenzo<sup>13</sup>, Ludovica Ferrari<sup>13</sup>, Vincenzo Malagnino<sup>13</sup>, Tiziana Mulas<sup>13</sup>, Benedetta Rossi<sup>13</sup>, Ilaria Spalliera<sup>13</sup>, Simona Tedde<sup>13</sup>, Elisabetta Teti<sup>13</sup>, Pietro Vitale<sup>13</sup>, Marta Zordan<sup>13</sup>, Giovanni Matera<sup>14</sup>, Enrico Maria Trecarichi<sup>14</sup>, Alessandro Russo<sup>14</sup>, Angela Quirino<sup>14</sup>, Nadia Marascio<sup>14</sup>, Salvatore Rotundo<sup>14</sup>.
