# Supplementary material for: Epidemiological and Clinical Features of SARS-CoV-2 Variants Circulating between April–December 2021 in Italy
Source: MDPI journal article supplement (doi:10.3390/v14112508), 2022-11-12
Supplement: s1 [file s1]

**Supplementary Table S1.** Number of individuals with known clinical status/outcome stratified according vaccination data.

| Clinical status | Vaccination status   | Month |     |      |      |        |           |         |          |          |
|-----------------|----------------------|-------|-----|------|------|--------|-----------|---------|----------|----------|
|                 |                      | April | May | June | July | August | September | October | November | December |
| Asymptomatics   | Partially Vaccinated | 4     | 4   | 0    | 3    | 1      | 6         | 1       | 5        | 30       |
|                 | Full Vaccinated      | 4     | 3   | 0    | 1    | 1      | 5         | 1       | 5        | 29       |
|                 | Unvaccinated         | 12    | 5   | 7    | 3    | 7      | 3         | 0       | 1        | 16       |
| Deceased        | Partially Vaccinated | 2     | 0   | 0    | 0    | 1      | 3         | 1       | 2        | 1        |
|                 | Full Vaccinated      | 0     | 0   | 0    | 0    | 1      | 2         | 1       | 2        | 1        |
|                 | Unvaccinated         | 3     | 2   | 2    | 1    | 0      | 2         | 0       | 1        | 1        |
| Hospitalized    | Partially Vaccinated | 4     | 8   | 13   | 12   | 13     | 14        | 17      | 12       | 41       |
|                 | Full Vaccinated      | 2     | 2   | 6    | 8    | 10     | 13        | 13      | 9        | 40       |
|                 | Unvaccinated         | 26    | 29  | 23   | 32   | 17     | 6         | 10      | 8        | 13       |
| Symptomatics    | Partially Vaccinated | 6     | 3   | 6    | 14   | 17     | 36        | 15      | 70       | 59       |
|                 | Full Vaccinated      | 2     | 2   | 0    | 5    | 14     | 32        | 13      | 63       | 55       |
|                 | Unvaccinated         | 39    | 36  | 16   | 17   | 47     | 27        | 2       | 10       | 33       |
